# Supplementary material for: Interrelationships among Fatty Acid Composition, Staphyloxanthin Content, Fluidity, and Carbon Flow in the Staphylococcus aureus Membrane
Source: MDPI journal article supplement (doi:10.3390/molecules23051201), 2018-05-17
Supplement: s1 [file s1]

Table S1. Sequences of the primers used in qRT-PCR assay

| Primer         | Sequence               |
|----------------|------------------------|
| <i>crtM</i> -F | CAATGTTTGAAACGGACGCTG  |
| <i>crtM</i> -R | CGATTCACCAAGTCTTCTTGCG |
| <i>rsbV</i> -F | TATGGATTCGACAGGTTTAGGT |
| <i>rsbV</i> -R | ACCGATACGATCTGACACAC   |
| <i>sigB</i> -F | TCTGATCGCGAACGAGAAATC  |
| <i>sigB</i> -R | ATTGCCGTTCTCTGAAGTCGT  |
| <i>fabH</i> -F | TAAAAGCAATCGCTGACGCTG  |
| <i>fabH</i> -R | CAACTTTGCCCGTCCCTAAAC  |
| <i>lpd</i> -F  | TGCAGCTGGTGATTGTATTGG  |
| <i>lpd</i> -R  | TACTGGGATTGGGTCCCT     |
| <i>fakA</i> -F | GCAAGTGAACAAGCAGCGAG   |
| <i>fakA</i> -R | TTGCGTCCACATCACATTGG   |
| <i>fapR</i> -F | AAAAGTGAATTGCGCGTGG    |
| <i>fapR</i> -R | TCGTGCTTCTGCTCTTACCG   |
| 16SrRNA-F      | CTGGAACTGAGACACGGTCC   |
| 16SrRNA-R      | GACCTTCATCACTCACGCGG   |
